# Supplementary material
Source: publisher site journal article supplement (http://www.kjim.org/upload/media/kjim-2017-251-suppl5.pdf)

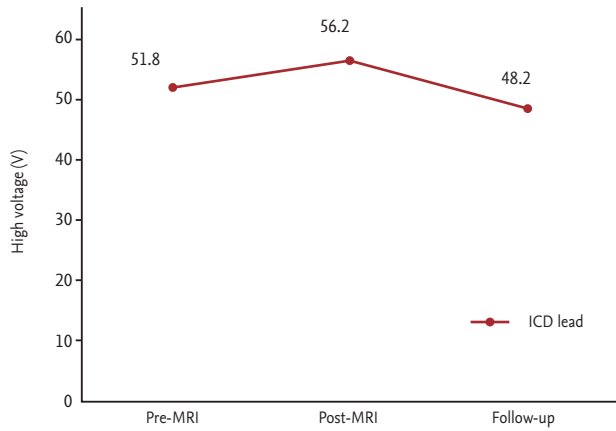

**Supplementary Figure 1.** Changes in the ventricular high voltage of the implantable cardioverter defibrillator (ICD) lead at pre-/post-magnetic resonance imaging (MRI) and follow-up visit ( $p = 0.79$ ). All ICDs were conventional devices.

**Episode: VF (250 bpm / 240 ms)** VT/VF Episode 1 of 1  
 20 Jun 2012 16:38 Page 2 of 3

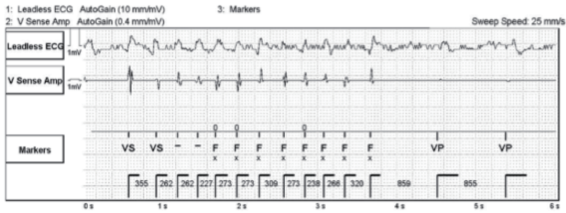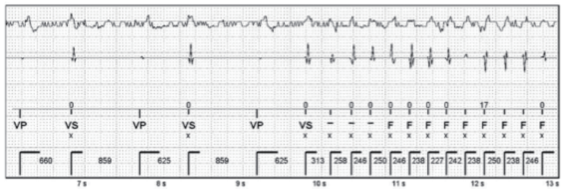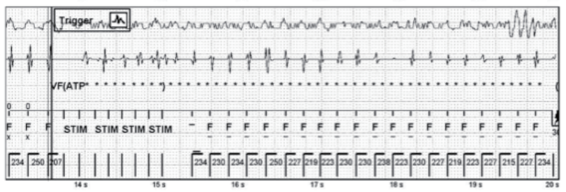

**Episodes Summary** Page 1 of 2

|                       |                   |           |                  |
|-----------------------|-------------------|-----------|------------------|
| Episodes Last Cleared | 10 Dec 2015 12:49 | Last Read | 8 Apr 2016 14:29 |
| SEGMs Last Cleared    | 10 Dec 2015 12:49 |           |                  |

| Therapy Summary         |      | Results of ATP Delivery |    |
|-------------------------|------|-------------------------|----|
| ATP Delivered           | 7    | VT                      | VF |
| Shocks Delivered        | 9    | 0                       | 1  |
| Max Energy Shocks       | 0    | 0                       | 6  |
| Last HV Lead Impedance  | 51 Ω | Accelerations           | 0  |
| VT Zone is Monitor Only |      |                         |    |
| Total Aborted Shocks    | 1    |                         |    |

|                      |    |
|----------------------|----|
| Total VT/VF Episodes | 10 |
| SVT Episodes         | 0  |

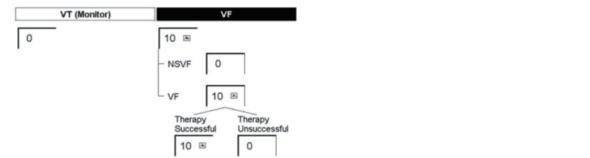

| VT/VF Episodes Date / Time | Type | Rate (min-1) | Duration (M.S) | Therapy Delivered | Alerts |
|----------------------------|------|--------------|----------------|-------------------|--------|
| 11 Mar 2016 8:55           | VF   | 255          | 00:15          | 30J               |        |
| 10 Mar 2016 1:57           | VF   | 230          | 00:15          | ATP, 30J          |        |
| 9 Mar 2016 17:13           | VF   | 230          | 00:15          | ATP, 30J          |        |
| 7 Mar 2016 20:56           | VF   | 230          | 00:16          | ATP, 30J          |        |
| 4 Mar 2016 20:44           | VF   | 235          | 00:16          | ATP, 30J          |        |
| 4 Mar 2016 7:36            | VF   | 228          | 00:15          | ATP, 30J          |        |
| 29 Feb 2016 14:21          | VF   | 235          | 00:15          | ATP, 30J          |        |
| 22 Feb 2016 1:36           | VF   | 260          | 00:16          | 30J               |        |
| 14 Jan 2016 4:12           | VF   | 250          | 00:07          | ATP               |        |
| 7 Jan 2016 16:18           | VF   | 285          | 00:15          | 30J               |        |

| Other Episodes Date / Time | Type                       | Peak A Rate (min-1) | Duration (D.H.M.S) | Alerts |
|----------------------------|----------------------------|---------------------|--------------------|--------|
| 5 Apr 2016 8:49            | Morphology Template Update |                     |                    |        |
| 29 Mar 2016 0:49           | Morphology Template Update |                     |                    |        |
| 25 Mar 2016 8:49           | Morphology Template Update |                     |                    |        |
| 11 Mar 2016 1:57           | Morphology Template Update |                     |                    |        |
| 5 Mar 2016 15:35           | Morphology Template Update |                     |                    |        |

**Episode: VF (250 bpm / 240 ms) (Continued)** VT/VF Episode 1 of 1  
 20 Jun 2012 16:38 Page 3 of 3

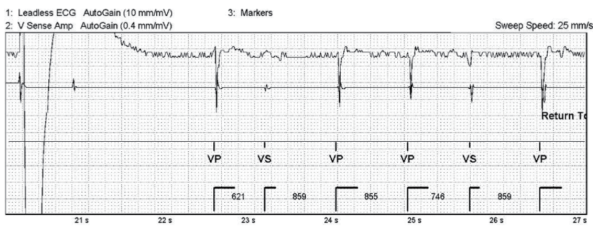

**Episode: VF (230 min-1 / 260 ms)** VT/VF Episode 9 of 10  
 10 Mar 2016 1:57 Page 2 of 3

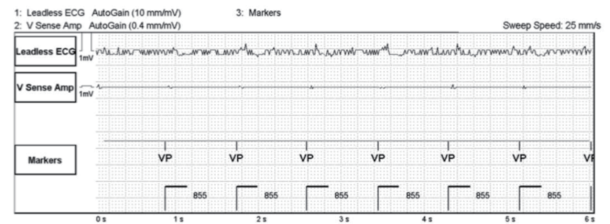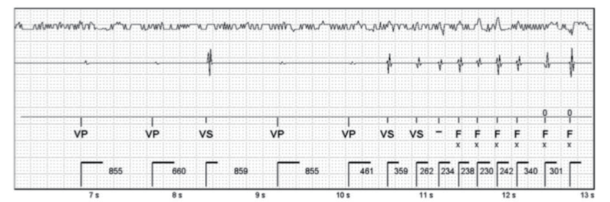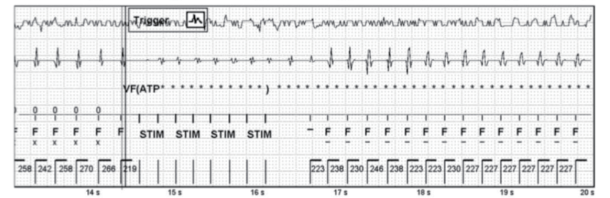

Supplement: Supplementary file 1 [file kjim-2017-251-suppl5.pdf]
